# Supplementary material for: Id4 Marks Spermatogonial Stem Cells in the Mouse Testis
Source: PubMed Central journal article supplement (PMC4665196; doi:10.1038/srep17594), 2015-12-01

## **Id4 Marks Spermatogonial Stem Cells in the Mouse Testis**

**Feng Sun<sup>1,\*</sup>, Qing Xu<sup>1</sup>, Danfeng Zhao<sup>1</sup>, and Charlie Degui Chen<sup>1,\*</sup>**

<sup>1</sup> State Key Laboratory of Molecular Biology, Shanghai Key laboratory of Molecular Andrology, Institute of Biochemistry and Cell Biology, Shanghai Institutes for Biological Sciences, Chinese Academy of Sciences, Shanghai 200031, China

\* Correspondence to: Dr. Feng Sun

Prof. Charlie Degui Chen

Rm.805, Floor 8, Cell Building, 320 Yueyang Road, Shanghai, China

Tel: +86 21 54921148

Fax: +86 21 54921148

E-mail: Feng Sun, [fengsun@outlook.com](mailto:fengsun@outlook.com);

Charlie Degui Chen, [cdchen@sibcb.ac.cn](mailto:cdchen@sibcb.ac.cn)

## **Supplemental Figure Legends**

### **Supplemental Figure 1.**

- a. Representative images of immunostaining for GFRA1 in cross-sections of seminiferous tubules from testes of Id4 knock-in mice.
- b. Representative images of immunostaining for Id4 in cross-sections of seminiferous tubules from testes of Id4 knock-in mice. Scale bar, 50  $\mu$ m.

### **Supplemental Figure 2. No marking was noted in control mice**

- a. Whole-mount seminiferous tubule X-gal staining of wild-type mice treated with TM (n = 6). No signal was detected.
- b. Whole-mount seminiferous tubule X-gal staining of Id4-CreERT2-tdTomato; ROSA26-flox-stop-lacZ double transgenic mice that were treated with vehicle (n = 5). No signal was detected.

### **Supplemental Figure 3. Spermatogenesis was not affected in wild-type mice treated with DTx**

- a. Experimental strategy for DTx treatment.
- b. Intact testes from PBS-treated (Ctr) and DTx-treated (DTx) mice. Wild-type mice were treated with PBS or DTx after TM induction. There is no significant difference in testicular morphology between control mice (left column, n = 5) and DTx-treated mice (right column, n = 5). Scale bar, 1 mm.
- c. H&E staining of paraffin-embedded sections from the testes of wild-type mice treated with PBS (Ctr, left column) or with DTx (DTx, right column). There is no significant difference between control mice (left column) and DTx-treated mice (right

column). Scale bar, 50  $\mu\text{m}$ .

**Supplemental Figure 4. The mean number of PLZF<sup>+</sup> cells per tubule cross-section was significantly decreased 8 days after busulfan treatment, compared with that of controls.**

- a. Immunofluorescence staining for PLZF in cross-sections of seminiferous tubules obtained from the mice 0, 4, and 8 days after busulfan treatment. Scale bar, 50  $\mu\text{m}$ .
- b. The mean number of PLZF<sup>+</sup> cells per tubule cross-section was significantly decreased after busulfan treatment, compared with that of controls. Three mice were analyzed for each time point. Error bars denote SEM.

**Supplemental Figure 1.**

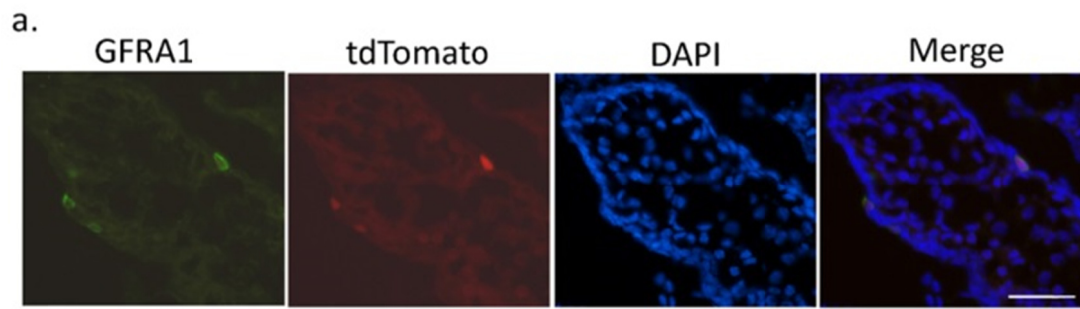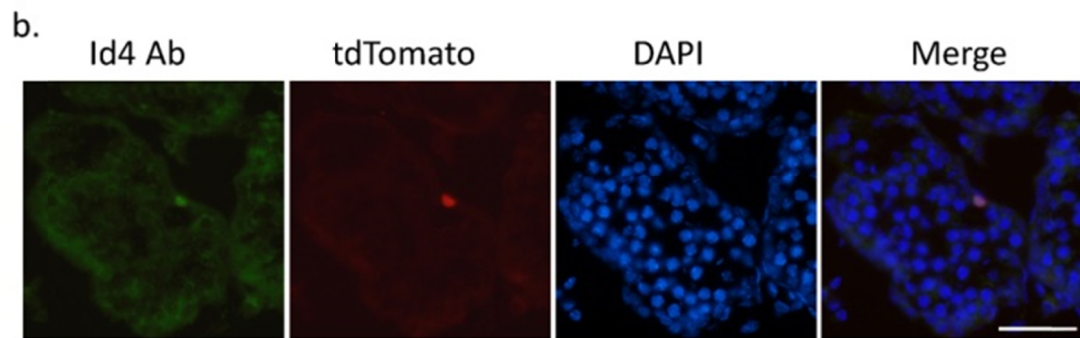

Supplemental Figure 2.

a.

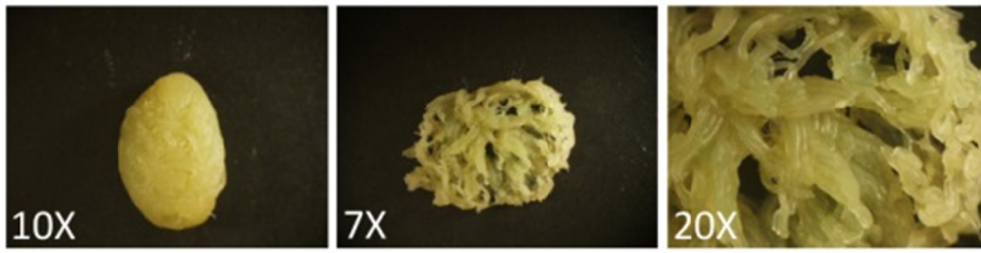

b.

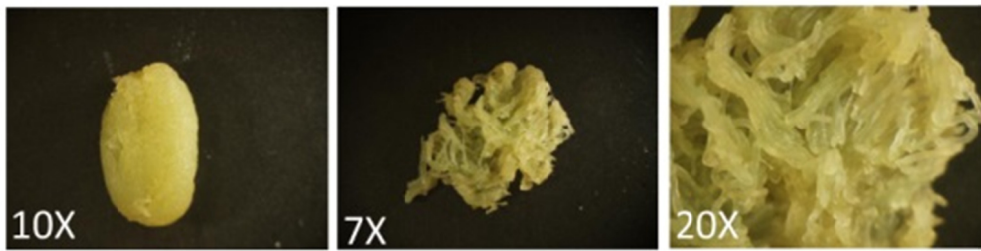

Supplemental Figure 3.

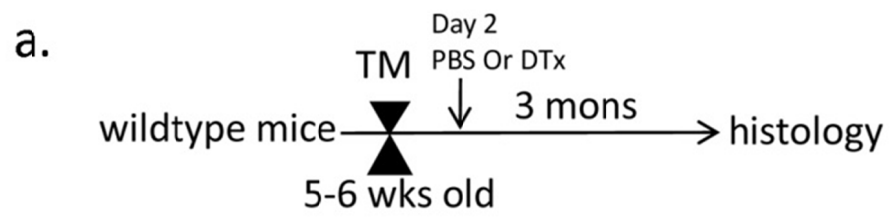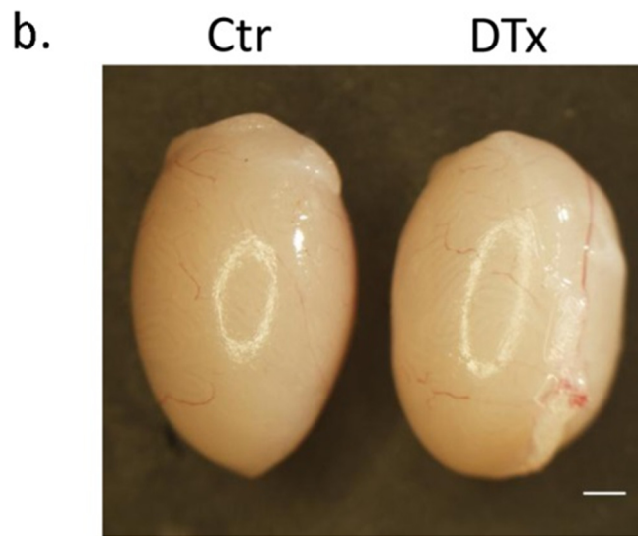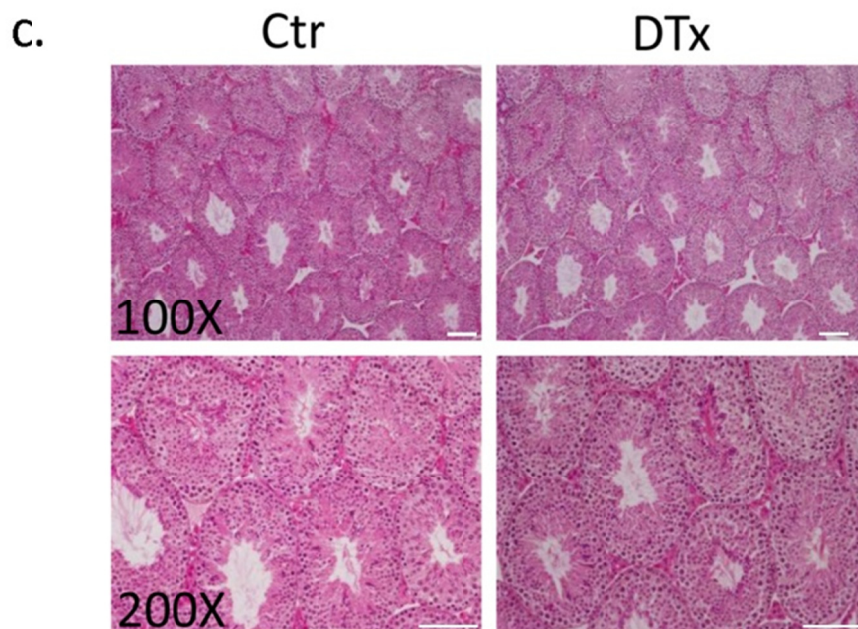

Supplemental Figure 4.

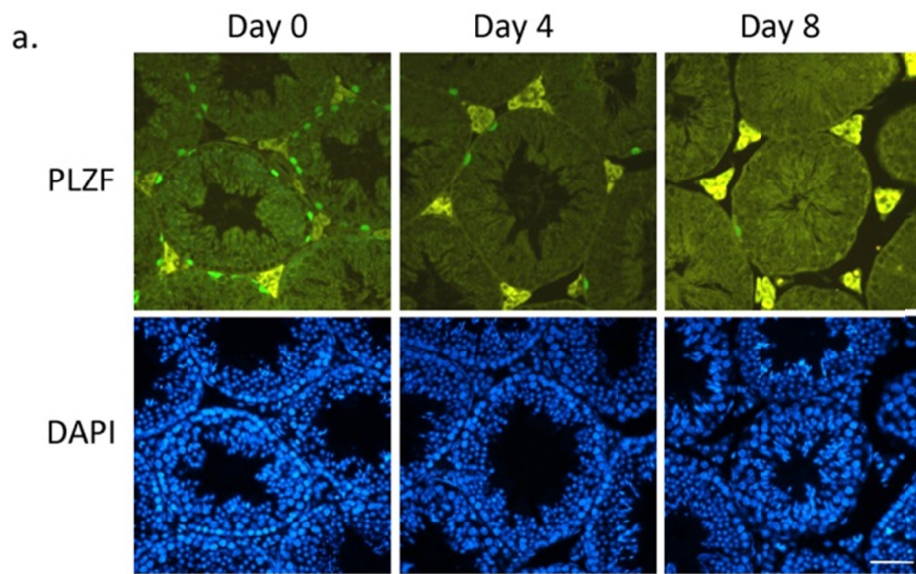

b.

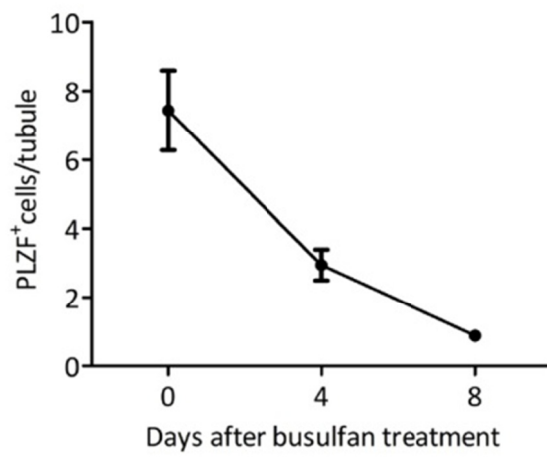

Supplement: srep17594-s1.pdf [file srep17594-s1.pdf]
